# Supplementary material for: Ultrastructural and molecular study of the microsporidian Toguebayea baccigeri n. gen., n. sp., a hyperparasite of the digenean trematode Bacciger israelensis (Faustulidae), a parasite of Boops boops (Teleostei, Sparidae)
Source: PubMed Central journal article supplement (PMC8805611; doi:10.1051/parasite/2022007), 2022-02-01
Supplement: parasite-29-2-s1.pdf [file parasite-29-2-s1.pdf]

**Table S1.** Result of the BLAST analyses for the nucleotide sequence obtained in this study MicroBac 01. (QC: query cover; Idt: identity).

| <b>Microsporidia</b>                                                                 | <b>Acc. Number</b> | <b>Host</b>                                                                           | <b>Taxonomy</b> | <b>QC</b> | <b>Idt</b> |
|--------------------------------------------------------------------------------------|--------------------|---------------------------------------------------------------------------------------|-----------------|-----------|------------|
| <i>Cucumispora</i> sp. KKB15                                                         | MG063425.1         | <i>Brandtia latissima</i>                                                             | Crustacea       | 99%       | 94.89%     |
| <i>Cucumispora</i> sp. KK1B16                                                        | MG063426.1         | <i>Brandtia latissima</i>                                                             | Crustacea       | 99%       | 94.81%     |
| <i>Microsporidium</i> sp. MSCLHCY01                                                  | HM800853.2         | <i>Lepeophtheirus hospitalis</i>                                                      | Crustacea       | 99%       | 94.86%     |
| <i>Hyperspora aquatica</i>                                                           | KX364284.1         | <i>Marteilia cochillia</i>                                                            | Paramyxida      | 99%       | 94.72%     |
| <i>Microsporidium</i> sp. Dhae17W                                                    | KP699690.1         | <i>Dikerogammarus haemobaphes</i>                                                     | Crustacea       | 99%       | 94.01%     |
| <i>Microsporidium</i> sp. 1049                                                       | FN434092.1         | <i>Gammarus duebeniduebeni</i>                                                        | Crustacea       | 99%       | 93.93%     |
| <i>Microsporidium</i> sp. JES2002G                                                   | AJ438962.1         | <i>Gammarus chevreuxi</i>                                                             | Crustacea       | 99%       | 93.49%     |
| <i>Cucumispora ornata</i>                                                            | KR190602.1         | <i>Dikerogammarus haemobaphes</i>                                                     | Crustacea       | 94%       | 93.58%     |
| <i>Cucumispora dikerogammari</i>                                                     | GQ426188.1         | <i>Dikerogammarus villosus</i>                                                        | Crustacea       | 99%       | 91.86%     |
| <i>Cucumispora dikerogammari</i>                                                     | GQ258752.1         | <i>Dikerogammarus villosus</i>                                                        | Crustacea       | 99%       | 91.85%     |
| <i>Cucumispora dikerogammari</i><br>(in GenBank: <i>Microsporidium</i> sp. RW-2009a) | KR871370.1         | <i>Dikerogammarus haemobaphes</i><br><i>Dikerogammarus villosus</i>                   | Crustacea       | 76%       | 91.97%     |
| <i>Microsporidium</i> sp. CRANPA                                                     | AJ966718.1         | <i>Crangonyx pseudogracilis</i>                                                       | Crustacea       | 65%       | 94.89%     |
| <i>Microsporidium</i> sp. EC-3                                                       | KT956054.1         | <i>Eulimnogammarus cyaneus</i>                                                        | Crustacea       | 69%       | 94.60%     |
| <i>Microsporidium</i> sp. EC-1                                                       | KR080135.1         | <i>Eulimnogammarus cyaneus</i>                                                        | Crustacea       | 69%       | 94.50%     |
| <i>Microsporidium</i> sp. EC-2                                                       | KT956053.1         | <i>Eulimnogammarus cyaneus</i>                                                        | Crustacea       | 68%       | 94.94%     |
| <i>Microsporidium</i> sp. G                                                          | KR871369.1         | <i>Dikerogammarus haemobaphes</i><br><i>Gammarus pulex</i><br><i>Gammarus roeseli</i> | Crustacea       | 76%       | 94.37%     |

**Table S2.** Comparison of small subunit gene (SSU rDNA) sequences among microsporidia parasites. Pairwise distance (bottom diagonal) obtained by p-distance.

| Species<br>(GenBank Acc.<br>Number)                  | 1     | 2     | 3     | 4     | 5     | 6     | 7     | 8     | 9     | 10    | 11    | 12    | 13    | 14    | 15    | 16 |
|------------------------------------------------------|-------|-------|-------|-------|-------|-------|-------|-------|-------|-------|-------|-------|-------|-------|-------|----|
| 1. <i>Microsporidia</i> sp. EC-1 (KR080135.1)        | -     |       |       |       |       |       |       |       |       |       |       |       |       |       |       |    |
| 2. <i>Microsporidia</i> sp. EC-2 (KT956053.1)        | 0.006 | -     |       |       |       |       |       |       |       |       |       |       |       |       |       |    |
| 3. <i>Microsporidium</i> sp. (FN434092.1)            | 0.040 | 0.035 | -     |       |       |       |       |       |       |       |       |       |       |       |       |    |
| 4. <i>Microsporidium</i> sp. CRANPA (AJ966718.1)     | 0.053 | 0.047 | 0.043 | -     |       |       |       |       |       |       |       |       |       |       |       |    |
| 5. <i>Microsporidium</i> sp. Dhae17W (KP699690.1)    | 0.023 | 0.017 | 0.049 | 0.049 | -     |       |       |       |       |       |       |       |       |       |       |    |
| 6. <i>Thelohania butleri</i> (DQ417114.1)            | 0.134 | 0.128 | 0.118 | 0.116 | 0.137 | -     |       |       |       |       |       |       |       |       |       |    |
| 7. <i>Potasporea morhaphis</i> (EU534408.1)          | 0.274 | 0.266 | 0.268 | 0.274 | 0.263 | 0.238 | -     |       |       |       |       |       |       |       |       |    |
| 8. <i>Toguebayera baccigeri</i> (MZ413057)           | 0.043 | 0.037 | 0.043 | 0.039 | 0.049 | 0.114 | 0.268 | -     |       |       |       |       |       |       |       |    |
| 9. <i>Cucumispora</i> sp. KKBIS (MG063425.1)         | 0.009 | 0.004 | 0.035 | 0.052 | 0.021 | 0.125 | 0.266 | 0.041 | -     |       |       |       |       |       |       |    |
| 10. <i>Cucumispora</i> sp. KK1BI6 (MG063426.1)       | 0.009 | 0.004 | 0.035 | 0.051 | 0.021 | 0.125 | 0.266 | 0.041 | 0.000 | -     |       |       |       |       |       |    |
| 11. <i>Microsporidium</i> sp. MSCLHCY01 (HM800853.2) | 0.057 | 0.051 | 0.053 | 0.047 | 0.063 | 0.120 | 0.277 | 0.051 | 0.049 | 0.049 | -     |       |       |       |       |    |
| 12. <i>Hyperspora aquatica</i> (KX364284.1)          | 0.055 | 0.049 | 0.055 | 0.049 | 0.065 | 0.123 | 0.274 | 0.053 | 0.047 | 0.047 | 0.002 | -     |       |       |       |    |
| 13. <i>Unikaryon legeri</i> (KX364285.1)             | 0.263 | 0.255 | 0.267 | 0.246 | 0.258 | 0.230 | 0.250 | 0.252 | 0.255 | 0.255 | 0.239 | 0.239 | -     |       |       |    |
| 14. <i>Unikaryon panopei</i> (MW377751.1)            | 0.260 | 0.253 | 0.259 | 0.242 | 0.255 | 0.233 | 0.251 | 0.242 | 0.253 | 0.253 | 0.234 | 0.234 | 0.051 | -     |       |    |
| 15. <i>Cucumispora ornata</i> (KR190602.1)           | 0.023 | 0.017 | 0.049 | 0.049 | 0.000 | 0.137 | 0.263 | 0.049 | 0.021 | 0.021 | 0.063 | 0.065 | 0.258 | 0.255 | -     |    |
| 16. <i>Cucumispora dikerogammari</i> (GQ258752.1)    | 0.067 | 0.061 | 0.078 | 0.055 | 0.070 | 0.146 | 0.277 | 0.067 | 0.065 | 0.065 | 0.078 | 0.076 | 0.266 | 0.267 | 0.070 | -  |
